# Supplementary material for: Synthesis and characterization of partially fluorinated aerogels and xerogels from environmentally-compatible precursors
Source: Royal Society of Chemistry journal article supplement (doi:10.1039/c7ra02016c), 2017-01-01
Supplement: c7ra02016c1.pdf [file c7ra02016c1.pdf]

Supporting information for

**Synthesis and characterization of partially fluorinated aerogels and xerogels from environmentally compatible precursors**

Abby R. Jennings,<sup>a</sup> Jena McCollum,<sup>a</sup> Adam J. Wilkins,<sup>a</sup> Stacy M. Manni<sup>b</sup> and Scott T. Iacono<sup>a\*</sup>

<sup>a</sup>Department of Chemistry & Chemistry Research Center, United States Air Force Academy, Colorado Springs, CO 80919 USA

<sup>b</sup>Air Force Research Laboratory, Munitions Directorate, Ordnance Division, Energetic Materials Branch, Eglin Air Force Base, FL 32542.

\* E-mail: [scott.iacono@usafa.edu](mailto:scott.iacono@usafa.edu)

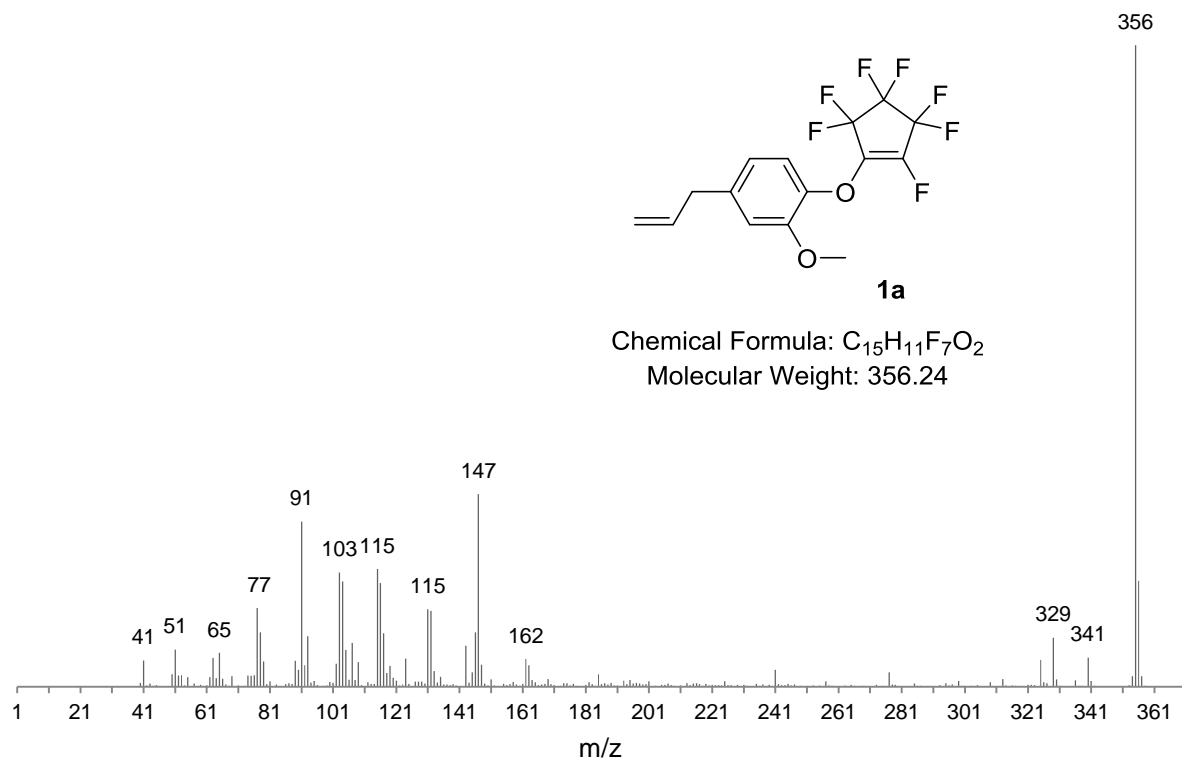

**Fig. S1** Mass spectrum of intermediate compound, **1a**, generated in situ.

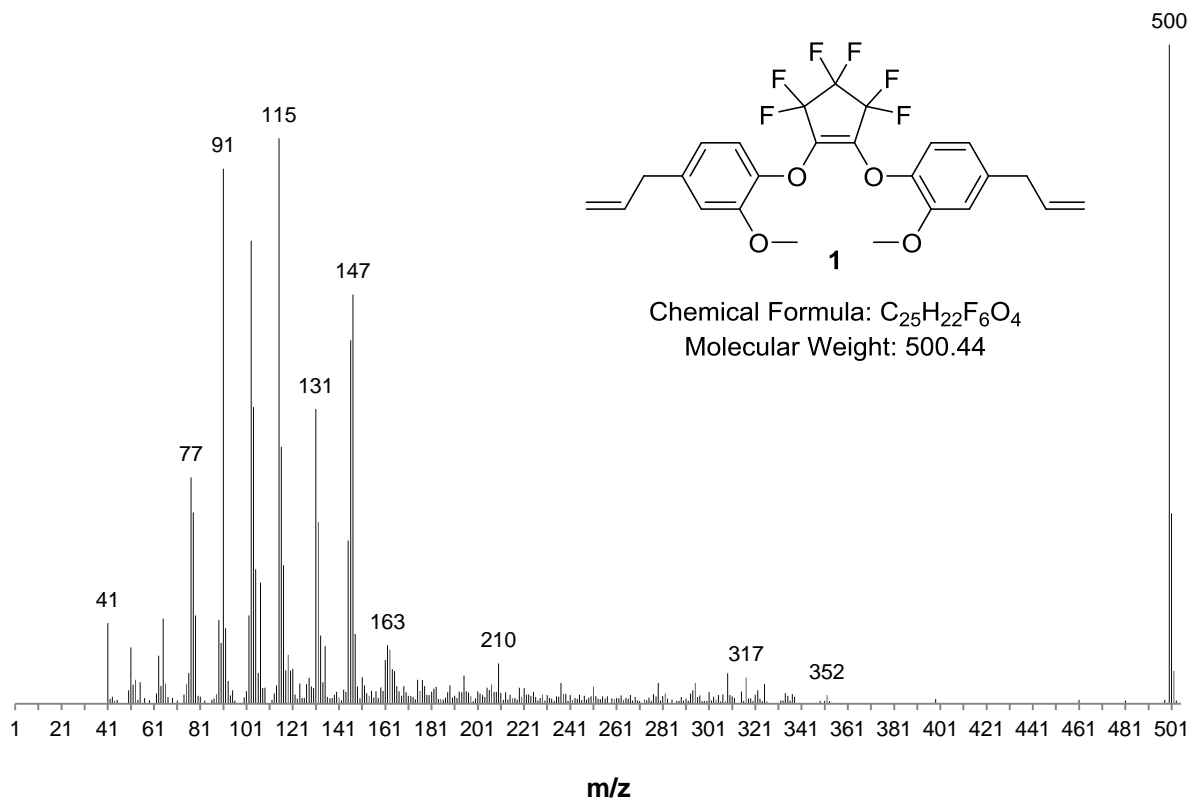

**Fig. S2** Mass spectrum of **1**.

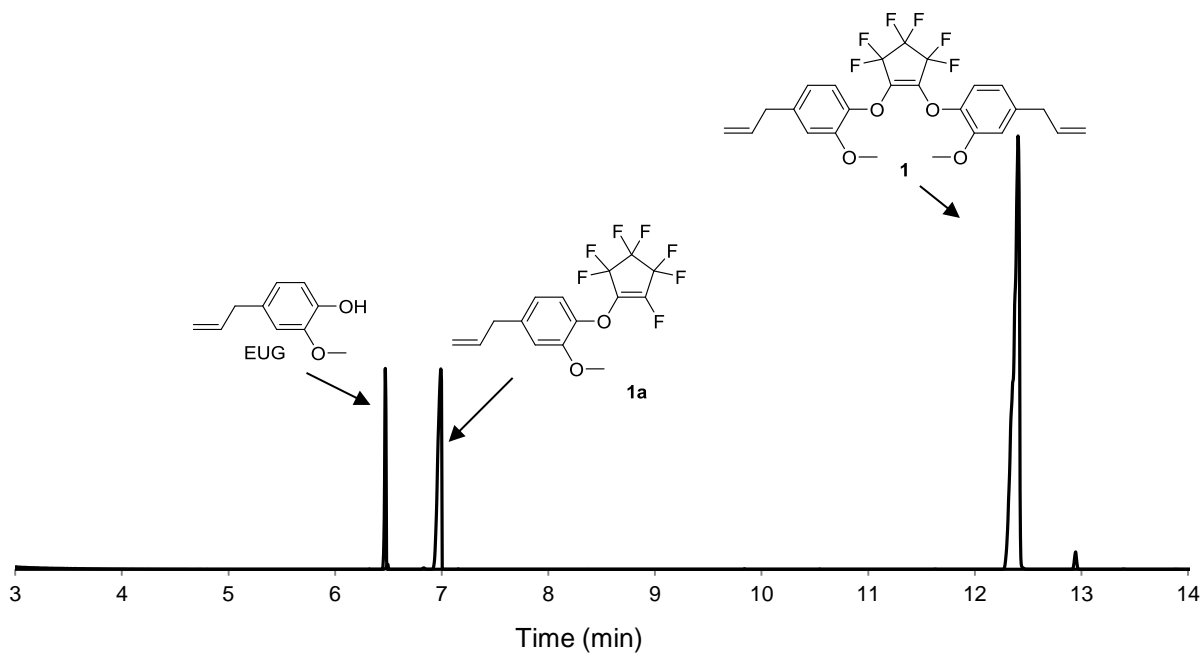

**Fig. S3** GC chromatogram showing the conversion of eugenol and **1a** into **1**.

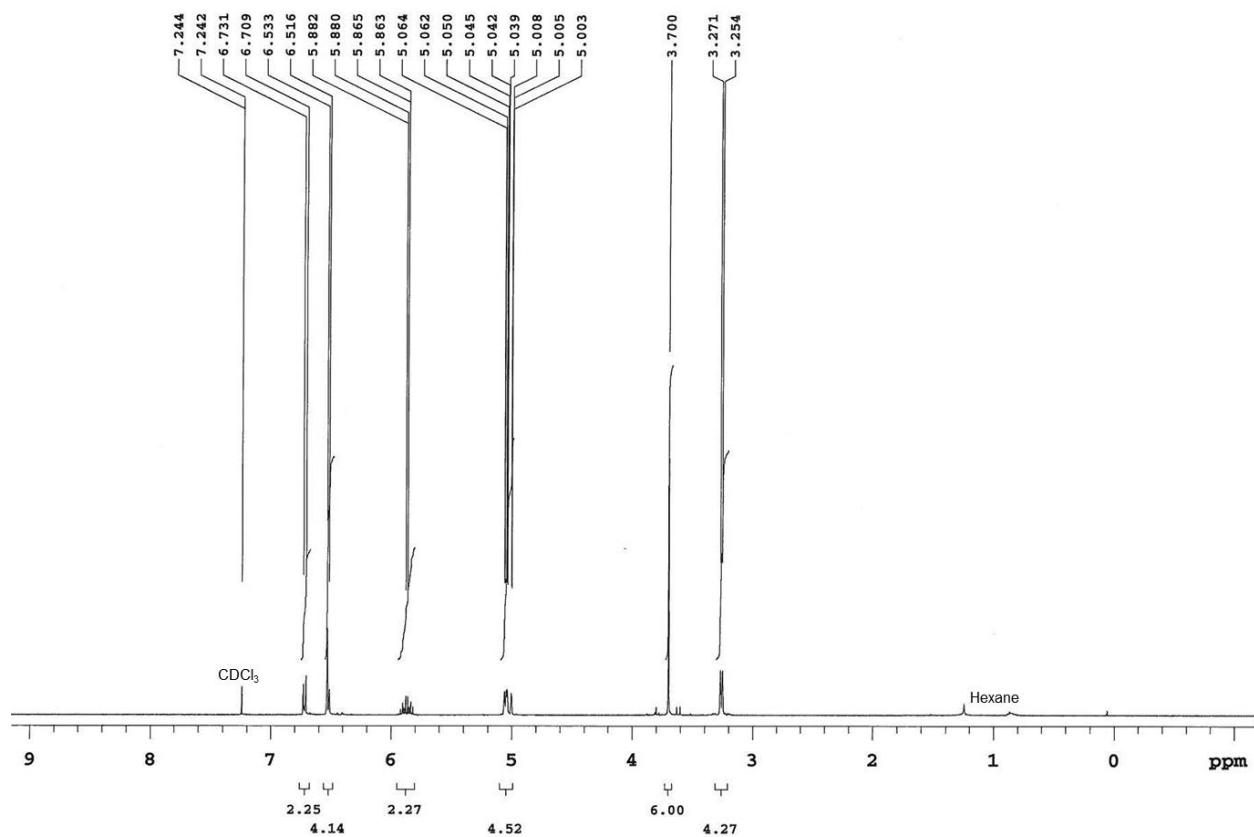

**Fig. S4** <sup>1</sup>H NMR Spectrum (400 MHz, CDCl<sub>3</sub>) of **1**.

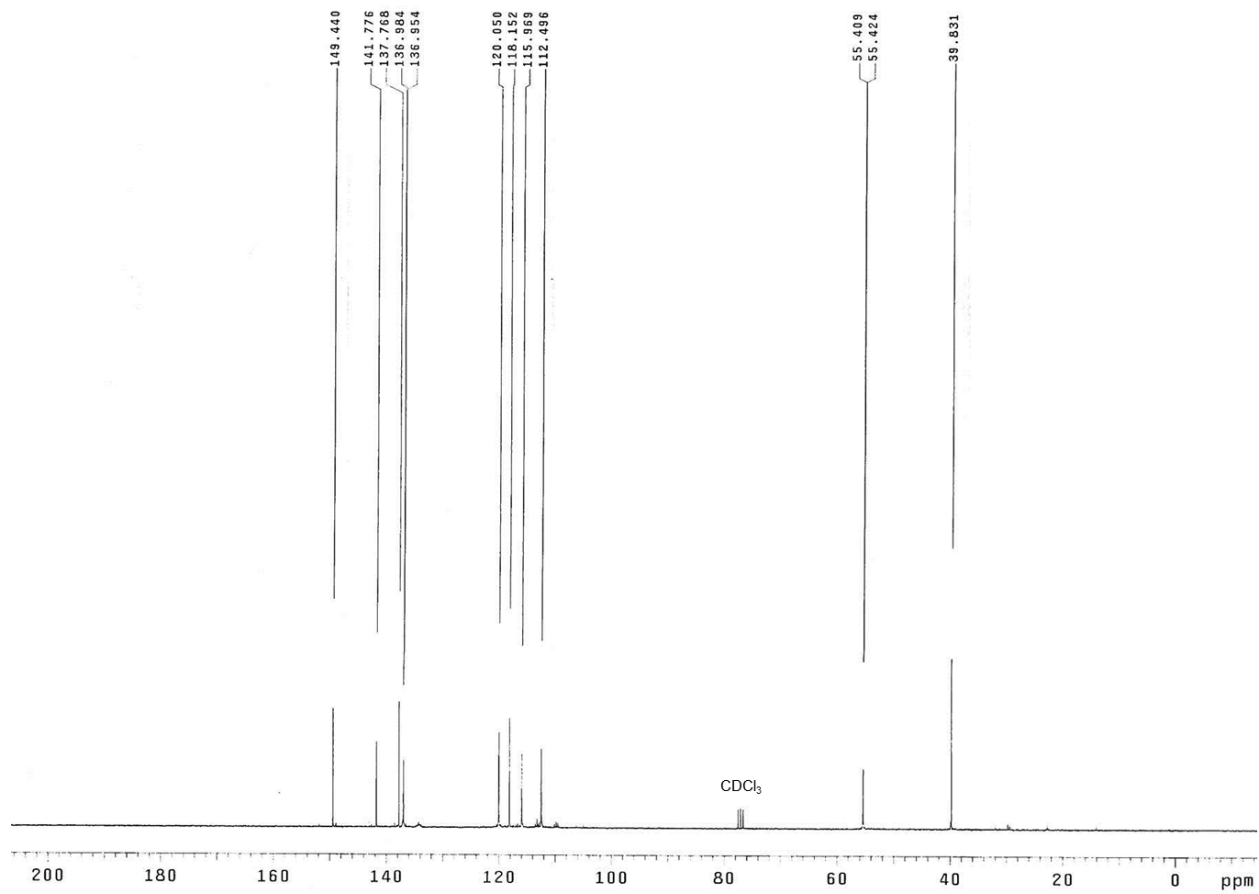

Fig. S5  $^{13}\text{C}$  NMR (75 MHz,  $\text{CDCl}_3$ ) of **1**.

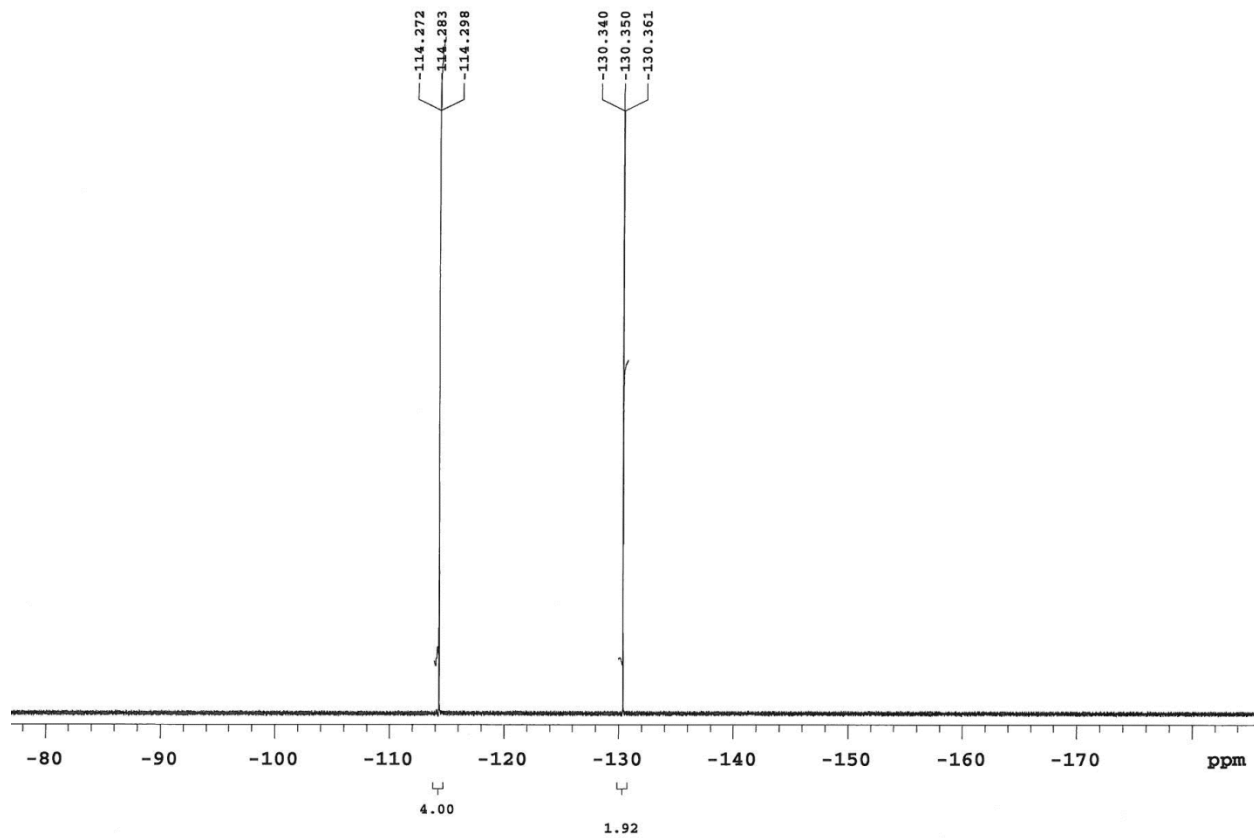

Fig. S6  $^{19}\text{F}$  NMR Spectrum (376 MHz,  $\text{CDCl}_3$ ) of **1**.

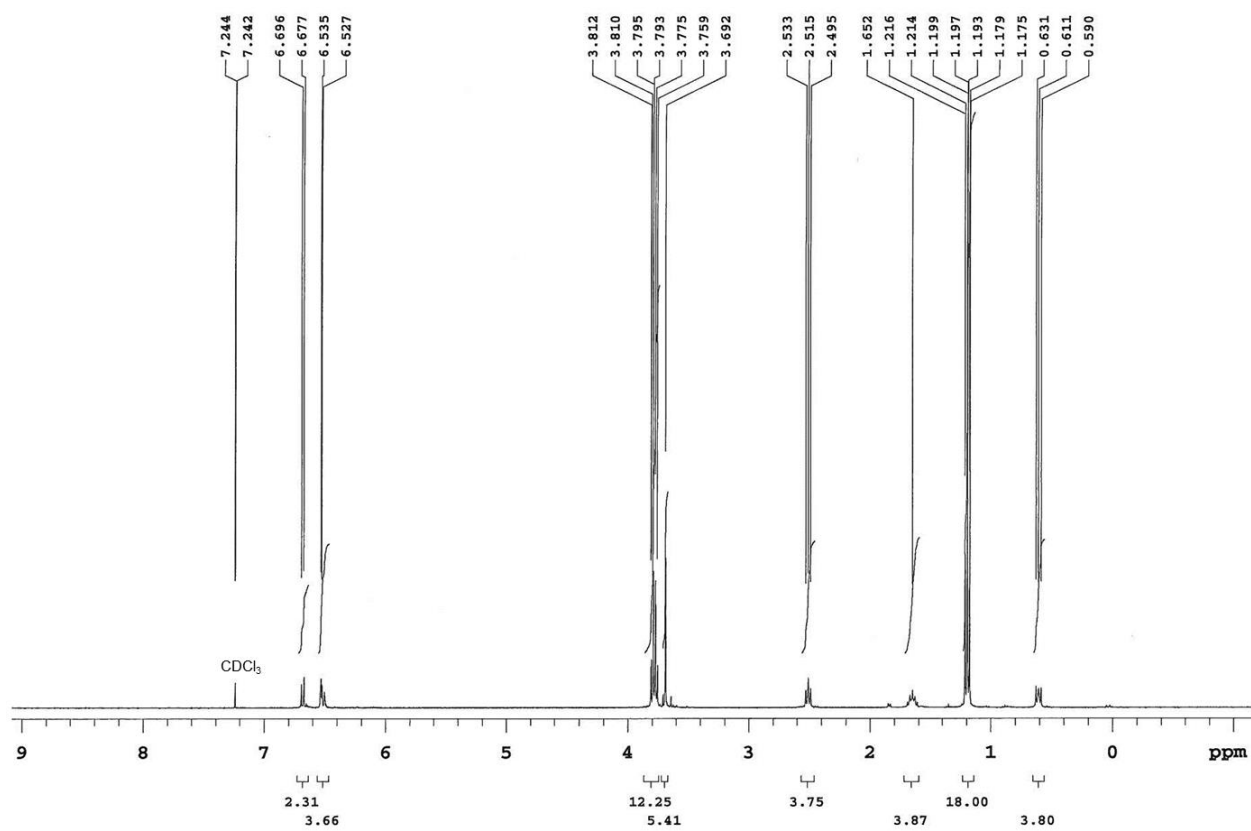

Fig. S7  $^1\text{H}$  NMR Spectrum (400 MHz,  $\text{CDCl}_3$ ) of **2**.

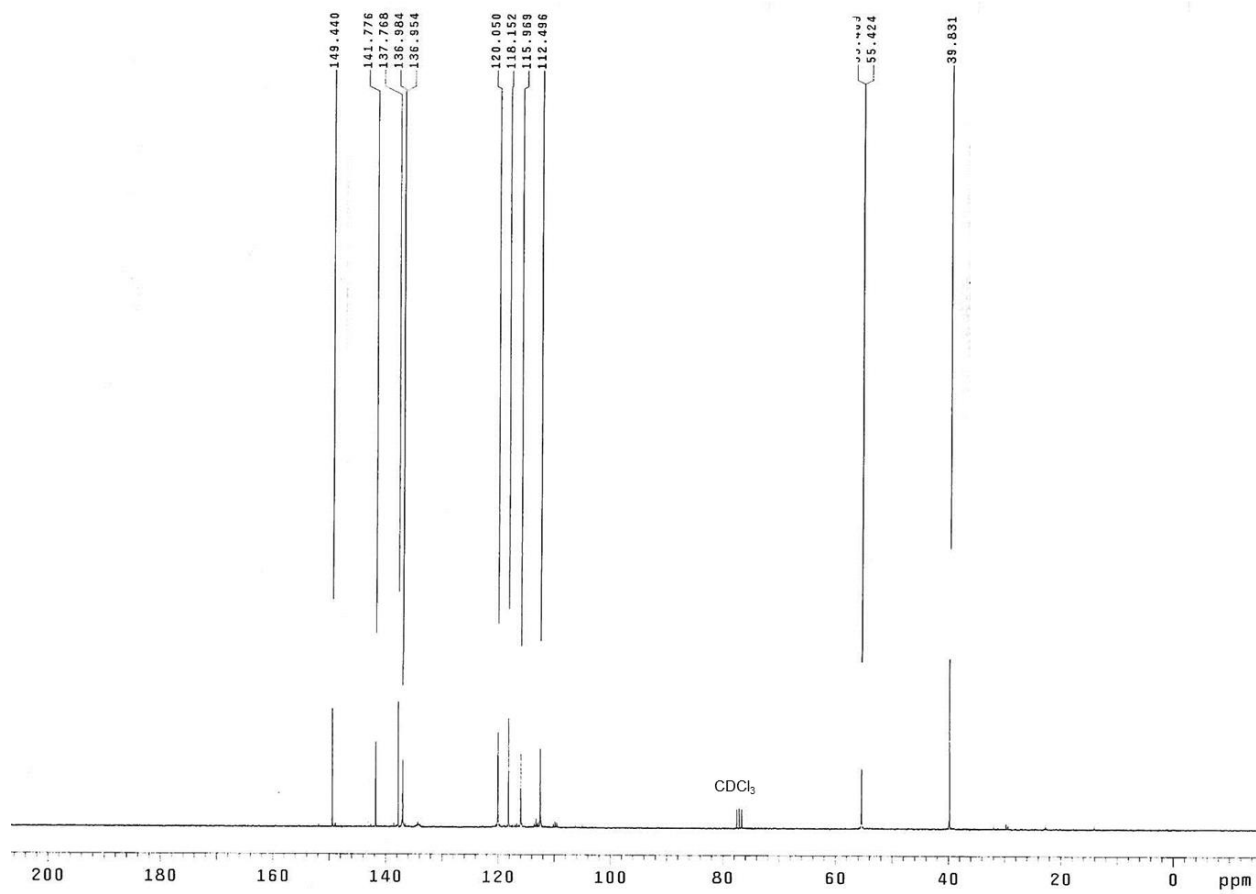

**Fig. S8**  $^{13}\text{C}$  NMR (75 MHz,  $\text{CDCl}_3$ ) of **2**.



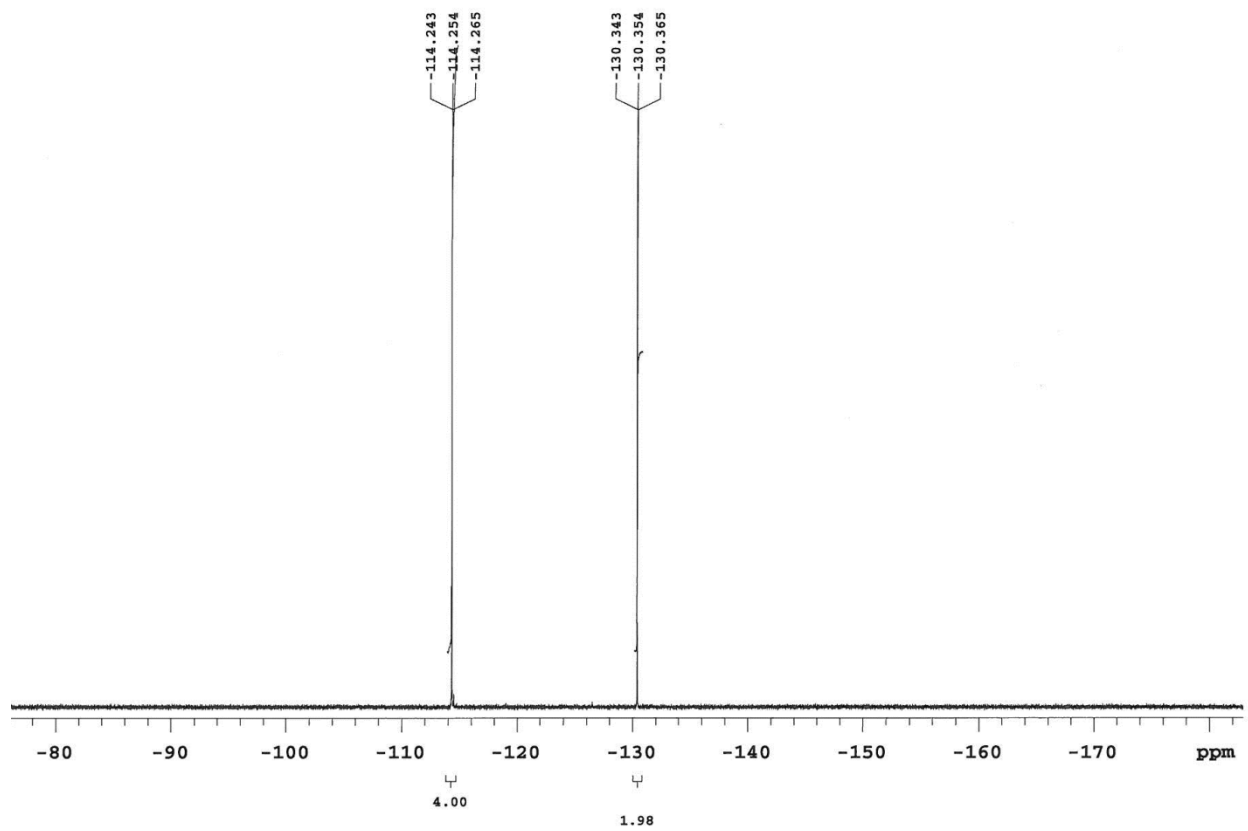

**Fig. S9**  $^{19}\text{F}$  NMR Spectrum (376 MHz,  $\text{CDCl}_3$ ) of **2**.

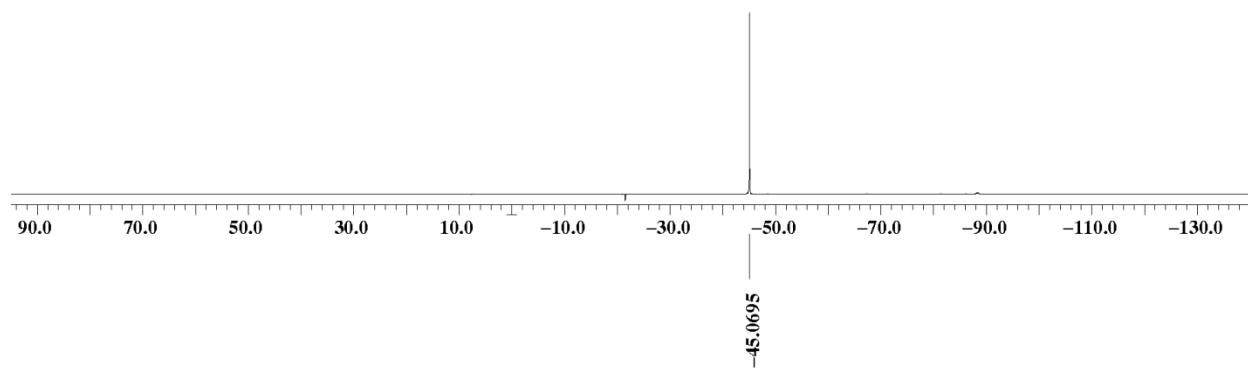

**Fig. S10**  $^{29}\text{Si}$  NMR Spectrum (99 MHz,  $\text{CDCl}_3$ ) of **2**.

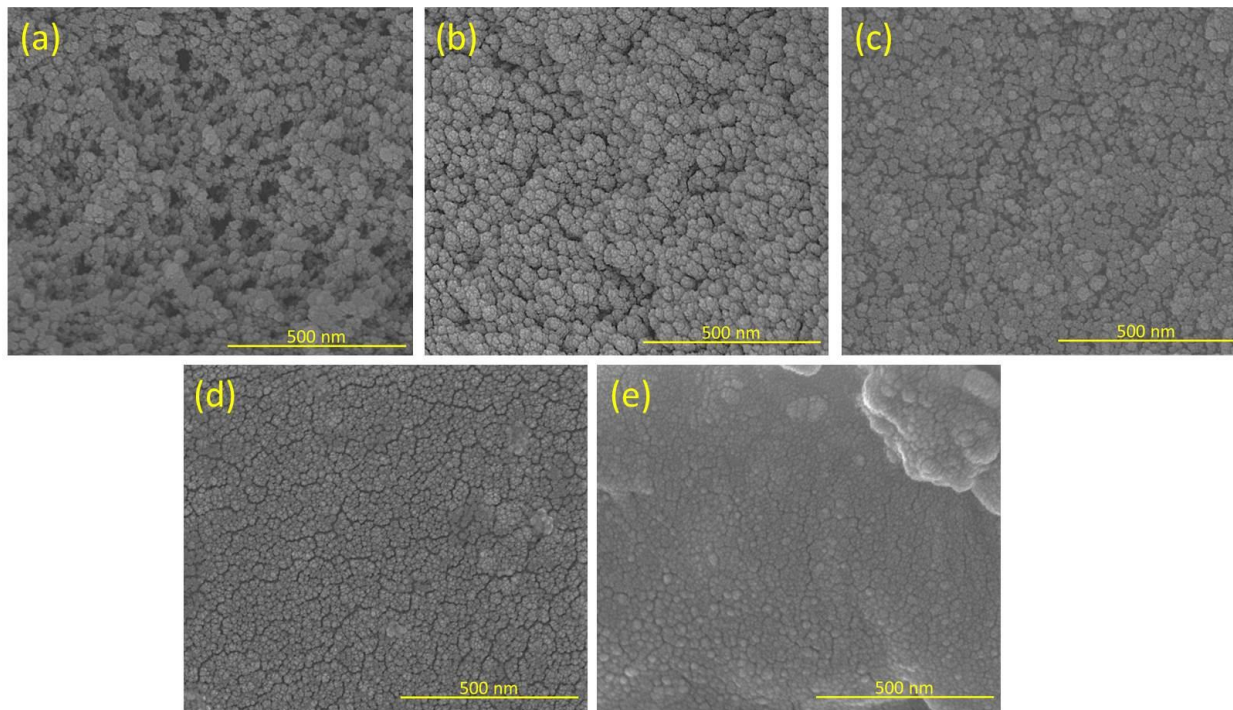

**Fig. S11** SEM images of TEOS aerogels with (a) 0%, (b) 20%, (c) 30%, (d) 50%, and (e) 100% of **2**.

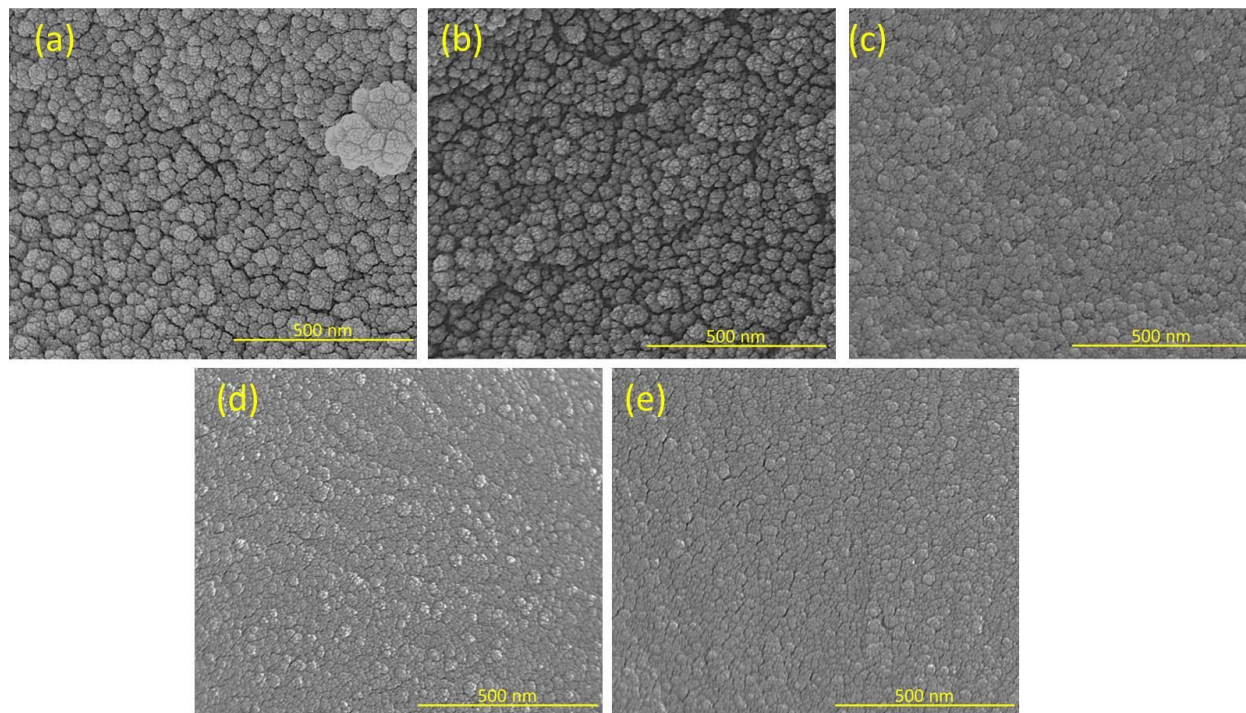

**Fig. S12** SEM images of TEOS xerogels with (a) 0%, (b) 20%, (c) 30%, (d) 50%, and (e) 100% of **2**.

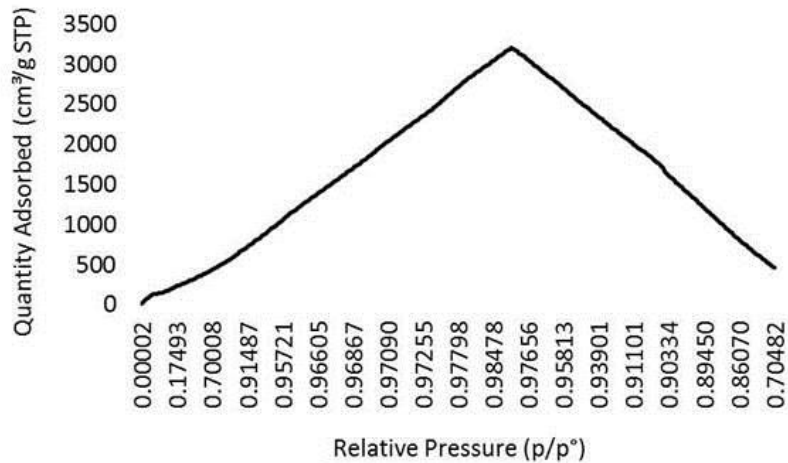

(a)

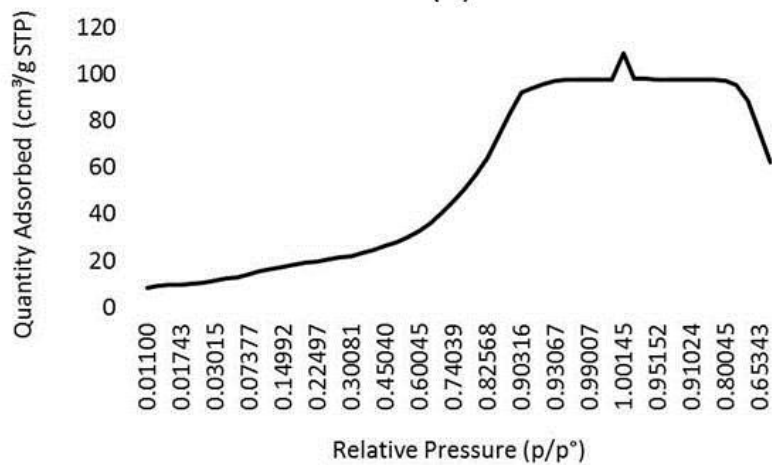

(b)

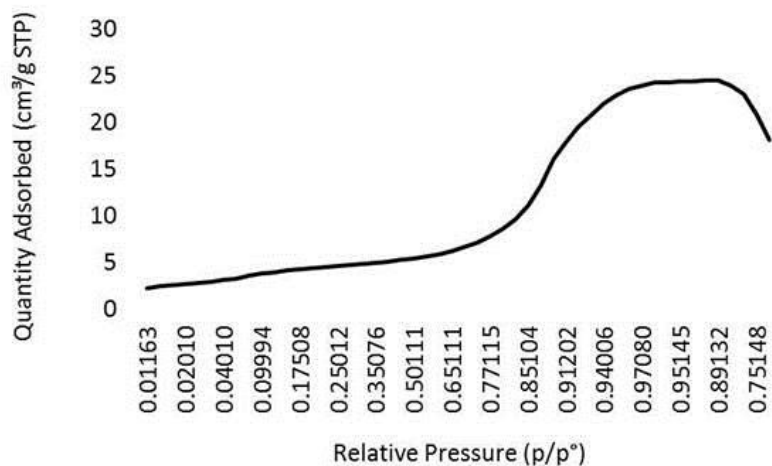

(c)

**Fig. S13** BET plots used for average surface area of aerogels for (a) 0%, (b) 20%, and (c) 30% of 2.
